# Supplementary material
Source: PubMed Central journal article supplement (PMC7680480)

**TITLE:** Effect of Corticosteroid Therapy on the Duration of SARS-CoV-2 Clearance in Patients with Mild COVID-19: A Retrospective Cohort Study

**Figure S1-** Flow diagram of study participants

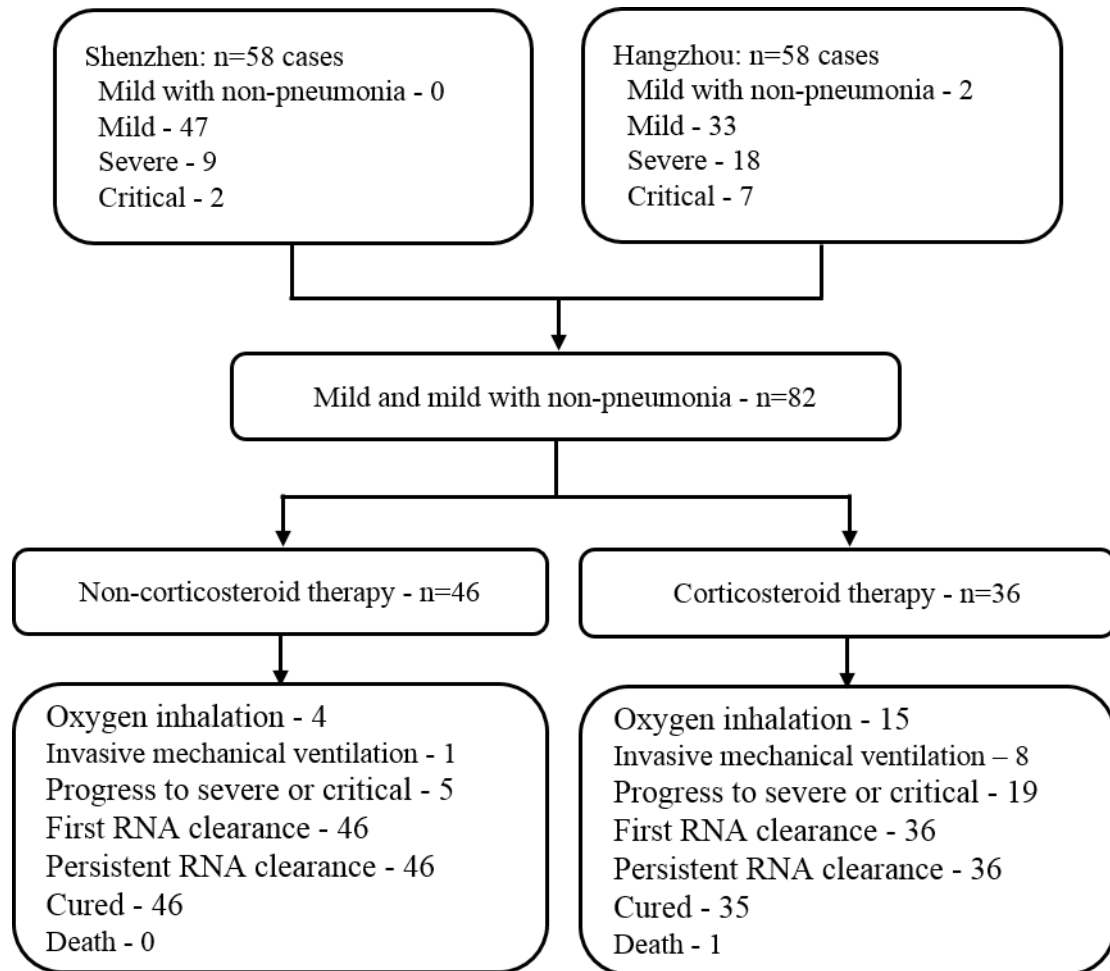

Supplement: 40121_2020_337_MOESM1_ESM.pdf [file 40121_2020_337_MOESM1_ESM.pdf]
